# Supplementary material
Source: PubMed Central journal article supplement (PMC3347211)
Supplement: supp_194.10.2693_FigS1_TableS1.pdf [file supp_194.10.2693_FigS1_TableS1.pdf]

**Figure S1. Alignment of MMP1081, MMP1082 and MMP1083 with WbuX, WbuY and WbuZ, respectively.**

```

WbuX      MENKNYQICNHCIMDTSDPHITFDDSGVCNYCANYKNNILPTWRKGLFSDVSLSEMASKI 60
MMP1081   MVQK---ICKRCIMDMTDPNIVFDENGYCNHCYNALEQNSKIKVNMAEKNKELKKIVNLI 57
* :*      **::**** :*:*.**:* * **:* *  ::      :      :. * : : : . *

WbuX      KADAKNSDFDCIIGLSGGLDSSYAAYIAKEKMGLRPLLPHVDAGWNTDQAVGNIEKLI 120
MMP1081   KKNGKKNRYDCIIGVSGGVDSYVAYLVK-KLGLKPLAVHLDNGWNSLAIMNIENTLKK 116
* :.*. . :*****:***:*.**:* * **:* ** . * * **:* : * : ** : :

WbuX      LGLELYTEVVNWEEMKDLQLSFLKSGIPDQDLVQDASFFSSLYKFARQHRIKHVITGSNF 180
MMP1081   LDIDLTRVNLNWEFVKDLQLSFLKASVPDLEIPTDHAIATLYEVAHKFGIKYIISGHN 176
* .:***.*:*****:*****:..** : : * : : : : ** : * : : * :

WbuX      STECCREPEEWGGYLGIDTLLFNDIHTKFGKPLKTFPLVDILVYKIYYQKILGMKVHHP 240
MMP1081   ITESIGVPMWSNGHY--DWKYISGLQKFKGNIKLLDYPKMTPLN-IFYYQFIKDIKMIRI 233
** . * . *: * : : : : ** : * : * : * : ** * . : : :

WbuX      LNLVFPNKKDAENELNKKFGWQPFQHKHHSRFRFRFYEDYWLPRRFGYKRRRAHFSSLI 300
MMP1081   LNYADYDKKRVVELIEKEFSWKDYPTKHGESIYTHFIQSYILPEKFGYDKRKCHLSNLI 293
** . : : * . : : : * . * : * * * : * * . * * : * * : * * : * *

WbuX      TGQMSREQALERISKPEMDEHFLKQEFYVAHKLGISVENLQELFFMPKTKYKDYKNKRW 360
MMP1081   SEQITRAEALGQFKKPLFTPQELEELINYSCKLEISRKEFESLMKLPNKSYYDYPS--Y 351
: * : * : * : : * : : * : : * . . * * : : : * : * : * * * . :

WbuX      LIGLGANVLRALGLEKRYFR 380
MMP1081   ENSKFYKFLRETYKKIRV- 370
. :.* * : * :

WbuY      MITIIDYGIGNIQAFNLVYKRLGINAGVARSVDDIFSAATHLIPPGVGAFDQAMTLFNNSG 60
MMP1082   MIAIIDYGMGNVGSIKNMIKIGFDAIITNDPELISKATKLILPGVGSFDSGMTNLKELG 60
** :*****:*. : : * : : : : * : : . * . * : * * * : * . * : : *

WbuY      LRDSIEKRVYEEKIPIIGICVGMQMLATSSEEGSMPGLGWIPGTVRAFSSNISSQNLMP 120
MMP1082   LIDILNKKVVQEKTPLLGICLGMHLLTNSSEEGRLKGLGFINAKTVKFK---LSNKFKIP 117
* * : : * * : * * * : * * : * * : * * : * * : * * . . . * . * : : : *

WbuY      HMGWNNLIKRTSTPLLKDFAVEPS-FYFLHSYYYECDDTGDVLATANYGHNFHCIISRNN 179
MMP1082   HMGWN-YVKFSIKNKLSDNLIENSRFYFVHSYYVICEDKKNILMTTEYENEFTSAVSKDN 176
***** : * : . * . * : * * * * : * * . : * * : * * : * . : * : *

WbuY      IYGIQCHPEKSHSSGSQLLKNFAEI- 204
MMP1082   IYGVQFHPEKSHKFGMKLMENFIKQA 202
***:* ***** . * : * : * * :

```

wbuZ MLRPRIIPCLLIHDSGLVKTVPNFKSPKYVGDPINAVKIFNEKEADELMVLDIDATSRGLE 60  
MMP1083 MYRNRIIPCLLLKDERLVKTVKFKDPNYIGDPLNAVRIFNDKEADELFFIDISASKR-ES 59  
\* \* \*\*\*\*\*:.\*. \*\*\*\*\*:\*.\*:.\*:\*\*\*:\*\*\*:\*\*\*:\*\*\*\*\*:.\*.\*\*:.\*

wbuZ PNYDLIKKLAAECRMPLCYGGVTSVAQATKIISLGVEKVSISAAVENPNLVRELA EAV 120  
MMP1083 INFDLLKKISSQSFMPPLGYAGGIKCLNDAKKIFSIGFEKISLNTIVLKNPDLITEISKIY 119  
\*:\*\*:\*\*:.\*. \*\*\* \*:\*\*:.:.\*:\*\*:\*\*:\*\*:\*\*:.:.\*:\*\*: \*:::

wbuZ GKQSVVVLDIIKRKGLFSKGYELSTRNNTRKHKIDPVSAKEMADLGAGEIVINFDND 180  
MMP1083 GSQSVLVTIDVKKN--FFGK-YYVYNHLKKKITKYNPVDFAKMEVLGAGELVINCVDND 176  
\*.\*\*\*:\*.\*\*:.\*. :\*. \* \* : .: .: \* :\*\*:\*\*:\*\* \*\*\*\*\*:\*\* \*\*

wbuZ GVMGGYDVAYCSTIKSQINIPVTFLLGAGSYDHLALIDQCGIVGAAAGSLFVFKGKYRA 240  
MMP1083 GVMKGYNLKLIQEISKAVKIPIVALGGAGSLKDLDLDAIN-VGASAAGAGSLFIYYGPHKA 235  
\*\*\* \*\*:: . \*.. \*\*:\*\*\*. \*\*\*\*\* ..\* . \* : \* .\*.\*\*\*\*\*:: \* ::\*

wbuZ VLISYPTPEQKDIICNGVMSNRL 263  
MMP1083 VLINYPRGD----- 244  
\*\*\*.\*\* :

Table S1. Primers used in this study.

| Primer name         | Sequence <sup>a</sup> (5'–3')                  | Restriction site |
|---------------------|------------------------------------------------|------------------|
| 1081upstream.rt.for | CATGACTAATCATGACTTCCCAAATGTC                   |                  |
| 1081upstream.rt.rev | GTATGCTACATAAGTACTGTCTACG                      |                  |
| MMP1081_For_RT      | ACTAGAGCGGAAGCATTAGGACAG                       |                  |
| MMP1082_Rev_RT      | CCTGAATCGAAAGATCCCCTCCCGG                      |                  |
| MMP1082_For_RT      | TATACTAATGACTACGGAATACG                        |                  |
| MMP1083_Rev_RT      | TAATGCCGCCAGCATAACCCAGAGGCATG                  |                  |
| MMP1084-083.RT.Rev  | GTTTTGGGTGCTGGAGAACTCG                         |                  |
| MMP1084-083.RT.For  | AATTTGGCGAATACTACGAAGC                         |                  |
|                     |                                                |                  |
| MMP1081_For_Up      | <u>CGGGATCC</u> AGATACGGAGATATTGAAG            | <i>Bam</i> HI    |
| MMP1081_Rev_Up      | AT <u>GGCGCGCC</u> GTTCAGTCATGTCCATAATGC       | <i>Asc</i> I     |
| MMP1081_For_Down    | AT <u>GGCGCGCC</u> AGCGGAAGCATTAGGACAG         | <i>Asc</i> I     |
| MMP1081_Rev_Down    | <u>CGGGATCC</u> GAACTCCATAGATGTTATCC           | <i>Bam</i> HI    |
| MMP1082_For_Up      | ATC <u>GGGATCC</u> TGGCGTAGACAGTACTTATGTAGC    | <i>Bam</i> HI    |
| MMP1082_Rev_Up      | ATC <u>GGCGCGCC</u> CCATTCCATAATCAATTATTGC     | <i>Asc</i> I     |
| MMP1082_For_Down    | ATC <u>GGCGCGC</u> CTATGGAGTTCAATTCATCCTG      | <i>Asc</i> I     |
| MMP1082_Rev_Down    | ATC <u>GGGATCC</u> GGAGCAATATTAATCTCCTCTCGG    | <i>Bam</i> HI    |
| MMP1083_For_Up      | ATC <u>GGGATCC</u> CTAGAGCGGAAGCATTAGGACAG     | <i>Bam</i> HI    |
| MMP1083_Rev_Up      | ATC <u>GGCGCGCC</u> GGATCACCTATATAATTTGGATC    | <i>Asc</i> I     |
| MMP1083_For_Down    | ATC <u>GGCGCGC</u> CATCCGAGAGGAGATTAATATTGCTCC | <i>Asc</i> I     |
| MMP1083_Rev_Down    | ATC <u>GGGATCC</u> TGGTTATGCTGGCGATGCAGTGG     | <i>Bam</i> HI    |
| MMP1081_For_Seq     | GATGCAGTATGCCATTTGAG                           |                  |
| MMP1081_Rev_Seq     | TCATTGGTTATAATAGCGTC                           |                  |
| MMP1082_For_Seq     | CTAGAGCGGAAGCATTAGGACAG                        |                  |

|                  |                                                                 |             |
|------------------|-----------------------------------------------------------------|-------------|
| MMP1082_Rev_Seq  | TATCATTGAATATCCTGACTGC                                          |             |
| MMP1083_For_Seq  | TCGAAGGATAACATCTATGGAG                                          |             |
| MMP1083_Rev_Seq  | TGGATTTATGGATAAACACATTG                                         |             |
| MMP1081_For_Comp | CCAATGCATGGTTCAAAAAATATGTAAAAGATGCATTA<br>TGG                   | <i>NsiI</i> |
| MMP1081_Rev_Comp | GCTCTAGATTAGTGATGGTGGTGATGATGGTAAACCCT<br>TATTTTTTTTATATGTTTCTC | <i>XbaI</i> |
| MMP1082_For_Comp | GGATGCATGATAGCAATAATTGATTATGG                                   | <i>NsiI</i> |
| MMP1082_Rev_Comp | AAACGCGTCTATGCCTGTTTTATAAAATTCTCC                               | <i>MluI</i> |
| MMP1083_For_Comp | GGATGCATGTATAGGAATAGAATAATACC                                   | <i>NsiI</i> |
| MMP1083_Rev_Comp | GGACGCGTTTAATCTCCTCTCGGATAGTTTA                                 | <i>MluI</i> |
| MMP1082_For_SDM  | GGCATTGTTTAGGAATGCACTTATTAACCAATTTCG                            |             |
| MMP1082_Rev_SDM  | CGAATTGGTTAATAAGTGCATTCCTAAACAAATGCC                            |             |

<sup>a</sup> The restriction sites indicated are underlined.
